# Supplementary material
Source: MDPI journal article supplement (https://www.mdpi.com/2073-4468/13/1/21)
Supplement: s1 [file s1]

## SUPPLEMENTARY MATERIAL

**Table S1.** Epidemiology of the Catastrophic antiphospholipid syndrome according to the literature

|                       |                        |         |
|-----------------------|------------------------|---------|
| Diagnosis             | Primary CAPS           | 60 %    |
|                       | SLE-associated CAPS    | 30 %    |
|                       | Others                 | 10 %    |
| Precipitating factors | Infections             | 30-50 % |
|                       | Surgery                | 17 %    |
|                       | Malignancy             | 16 %    |
|                       | Contraceptive          | 10 %    |
|                       | Pregnancy-related      | 8-22 %  |
|                       | Discontinuation of AC  | unknown |
|                       | SLE flare              | 3 %     |
|                       | Others                 | 20 %    |
| Mortality rate        | Overall CAPS           | 37 %    |
|                       | Primary CAPS           | 33 %    |
|                       | SLE-associated CAPS    | 48 %    |
| Laboratory features   | Thrombocytopenia       | 67 %    |
|                       | Schistocytes           | 22 %    |
|                       | TMA <sup>a</sup>       | 14 %    |
|                       | DIC <sup>b</sup>       | 11 %    |
|                       | Lupus anticoagulant    | 83 %    |
|                       | aCL IgG                | 81 %    |
|                       | aCL IgM                | 49 %    |
|                       | a $\beta$ 2GPI IgG     | 78 %    |
|                       | a $\beta$ 2GPI IgM     | 40 %    |
|                       | Antinuclear antibodies | 57 %    |
|                       | Anti-DNA antibodies    | 32 %    |

<sup>a</sup> TMA; Thrombotic microangiopathy defined as those patients with low platelet count, hemolysis features and schistocytes.

<sup>b</sup> DIC: Disseminated intravascular coagulation defined as those patients with low platelet count, d-dimer increase and low prothrombin time.

CAPS: catastrophic antiphospholipid syndrome; SLE: systemic lupus erythematosus; aCL: anticardiolipin antibodies;  $\alpha\beta 2$ GP1: anti-beta-2 Glycoprotein 1 antibodies
